# Supplementary material for: Enzymatic Synthesis of Novel and Highly Soluble Puerarin Glucoside by Deinococcus geothermalis Amylosucrase
Source: MDPI journal article supplement (doi:10.3390/molecules27134074), 2022-06-24
Supplement: s1 [file s1]

**Supplementary Materials:** Enzymatic Synthesis of Novel and Highly-Soluble Puerarin

Glucoside by *Deinococcus geothermalis* Amylosucrase

Hsiou-Yu Ding, <sup>1,+</sup> Tzi-Yuan Wang, <sup>2,+</sup> Jiumn-Yih Wu, <sup>3,+</sup> Yu-Li Tsai <sup>4</sup> and Te-Sheng Chang, <sup>4,\*</sup>

<sup>1</sup> Department of Cosmetic Science, Chia Nan University of Pharmacy and Science, No. 60,  
Sec. 1, Erh-Jen Rd., Jen-Te District, Tainan 717, Taiwan

<sup>2</sup> Biodiversity Research Center, Academia Sinica, Taipei 115, Taiwan

<sup>3</sup> Department of Food Science, National Quemoy University, Kinmen County 892, Taiwan

<sup>4</sup> Department of Biological Sciences and Technology, National University of Tainan,  
Tainan 700, Taiwan

\* Correspondence: mozyme2001@gmail.com; Tel.: +886-6-2602137; Fax: +886-6-2606153

+ The authors contributed equally

## Contents

**Table S1.**  $^1\text{H}$  and  $^{13}\text{C}$  NMR assignments in  $\text{DMSO-}d_6$  at 700 and 175 MHz for compounds (**1**).

**Figure S1.** High-performance liquid chromatography (HPLC) analysis of the biotransformation products of puerarin using *Deinococcus geothermalis* amylosucrase (DgAS).

**Figure S2.** The mass-mass analysis of puerarin-4'-*O*- $\beta$ -glucoside (**1**) at the negative mode.

**Figure 3.** The infrared (IR) analysis of puerarin-4'-*O*- $\beta$ -glucoside (**1**).

**Figure S4.** 1D NMR spectrum ( $^1\text{H}$ -NMR, 700 MHz,  $\text{DMSO-}d_6$ ) of the puerarin-4'-*O*- $\beta$ -glucoside (**1**).

**Figure S5.** 1D NMR spectrum ( $^{13}\text{C}$ -NMR, 175 MHz,  $\text{DMSO-}d_6$ ) of the puerarin-4'-*O*- $\beta$ -glucoside (**1**).

**Figure S6.** 1D NMR spectrum (DEPT-135, 175 MHz,  $\text{DMSO-}d_6$ ) of the puerarin-4'-*O*- $\beta$ -glucoside (**1**).

**Figure S7.** 2D NMR spectrum ( $^1\text{H}$ - $^{13}\text{C}$  HSQC, 700 MHz,  $\text{DMSO-}d_6$ ) of the puerarin-4'-*O*- $\beta$ -glucoside (**1**).

**Figure S8.** 2D NMR spectrum ( $^1\text{H}$ - $^{13}\text{C}$  HMBC, 700 MHz,  $\text{DMSO-}d_6$ ) of the puerarin-4'-*O*- $\beta$ -glucoside (**1**).

**Figure S9.** 2D NMR spectrum ( $^1\text{H}$ - $^1\text{H}$  COSY, 700 MHz,  $\text{DMSO-}d_6$ ) of the puerarin-4'-*O*- $\beta$ -glucoside (**1**).

**Figure S10.** 2D NMR spectrum ( $^1\text{H}$ - $^1\text{H}$  NOESY, 700 MHz,  $\text{DMSO-}d_6$ ) of the puerarin-4'-*O*- $\beta$ -glucoside (**1**).

**Table S1.**  $^1\text{H}$  and  $^{13}\text{C}$  NMR assignments in DMSO- $d_6$  at 700 and 175 MHz for compounds (1).

| position | $\delta_{\text{C}}$ | $\delta_{\text{H}}$ (J in HZ) |
|----------|---------------------|-------------------------------|
| 2        | 153.1               | 8.42, s                       |
| 3        | 122.7               |                               |
| 4        | 174.8               |                               |
| 4a       | 116.6               |                               |
| 5        | 126.6               | 7.94, d, $J=8.8$ Hz           |
| 6        | 116.6               | 6.99, d, $J=8.8$ Hz           |
| 7        | 161.4               |                               |
| 8        | 112.7               |                               |
| 8a       | 156.9               |                               |
| 1'       | 125.6               |                               |
| 2'       | 129.9               | 7.52, d, $J=8.8$ Hz           |
| 3'       | 116.6               | 7.13, d, $J=8.8$ Hz           |
| 4'       | 156.9               |                               |
| 5'       | 116.6               | 7.13, d, $J=8.8$ Hz           |
| 6'       | 129.9               | 7.52, d, $J=8.8$ Hz           |
| 1''      | 73.4                | 4.81, d, $J=9.1$ Hz           |
| 2''      | 70.7                | 4.03, t, $J=9.1$ Hz           |
| 3''      | 78.8                | 3.26, t, $J=9.1$ Hz           |
| 4''      | 69.9                | 3.13, m                       |
| 5''      | 81.9                | 3.24, m                       |
| 6''      | 61.4                | 3.43, m                       |
|          |                     | 3.72, m                       |
| 1'''     | 98.0                | 5.42, d, $J=3.5$ Hz           |
| 2'''     | 71.6                | 3.35, m                       |
| 3'''     | 73.1                | 3.64, m                       |
| 4'''     | 69.9                | 3.13, m                       |
| 5'''     | 73.8                | 3.48, m                       |
| 6'''     | 60.7                | 3.47, m                       |
|          |                     | 3.57, m                       |

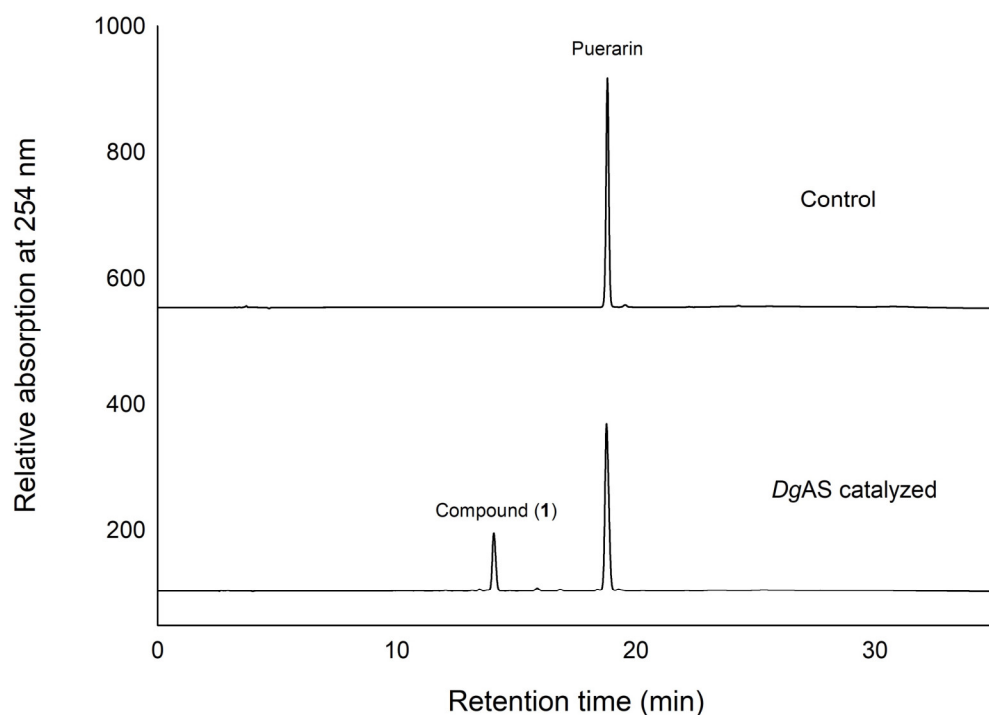

**Figure S1.** High-performance liquid chromatography (HPLC) analysis of the biotransformation products of puerarin using *Deinococcus geothermalis* amylosucrase (*DgAS*). The *DgAS* biotransformation mixture containing 25  $\mu$ g/mL of purified recombinant *DgAS* enzymes, 1 mg/mL of puerarin, 50% (w/v) sucrose, and 50 mM of phosphate buffer at pH 7 was incubated at 40°C for 24 h. After incubation, the biotransformation products were analyzed by HPLC. The HPLC operation procedure is described in the Materials and methods section.

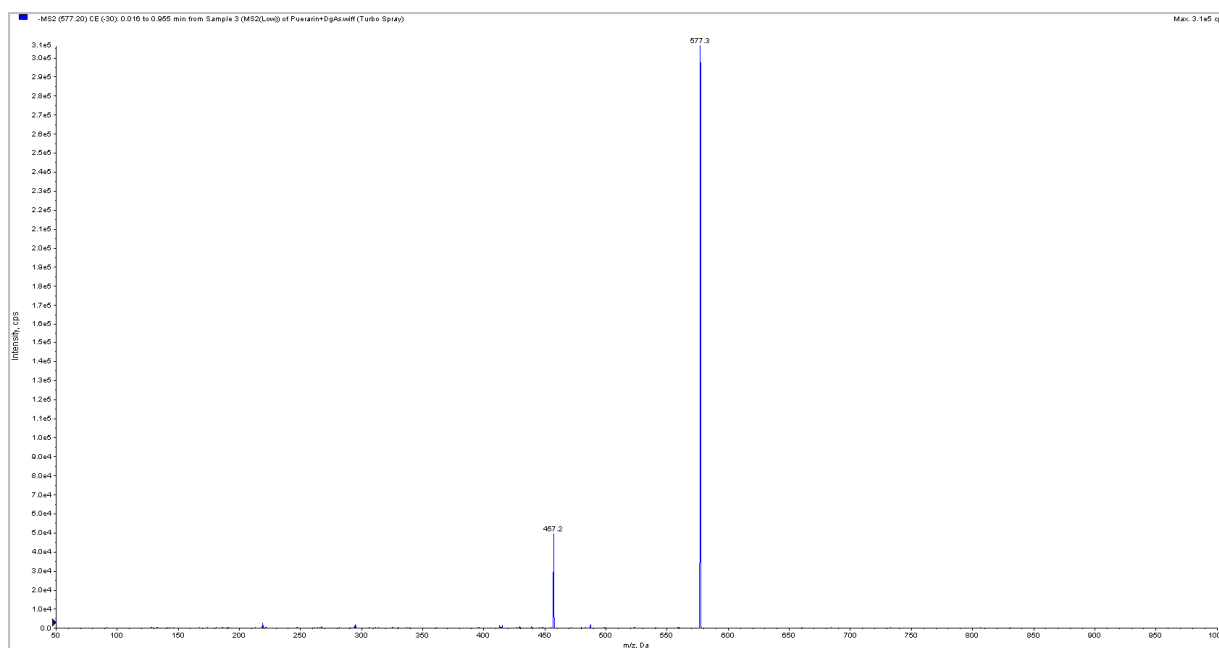

**Figure S2.** The mass-mass analysis of puerarin-4'-*O*- $\beta$ -glucoside (**1**) at the negative mode. A significant signal at  $m/z$  577.3 showed the corresponding  $m/z$  signal of molecular weight 416 of puerarin-4'-*O*- $\beta$ -glucoside (**1**) ( $416+180-18-1$ ) at the negative mode [puerarin -G - H].

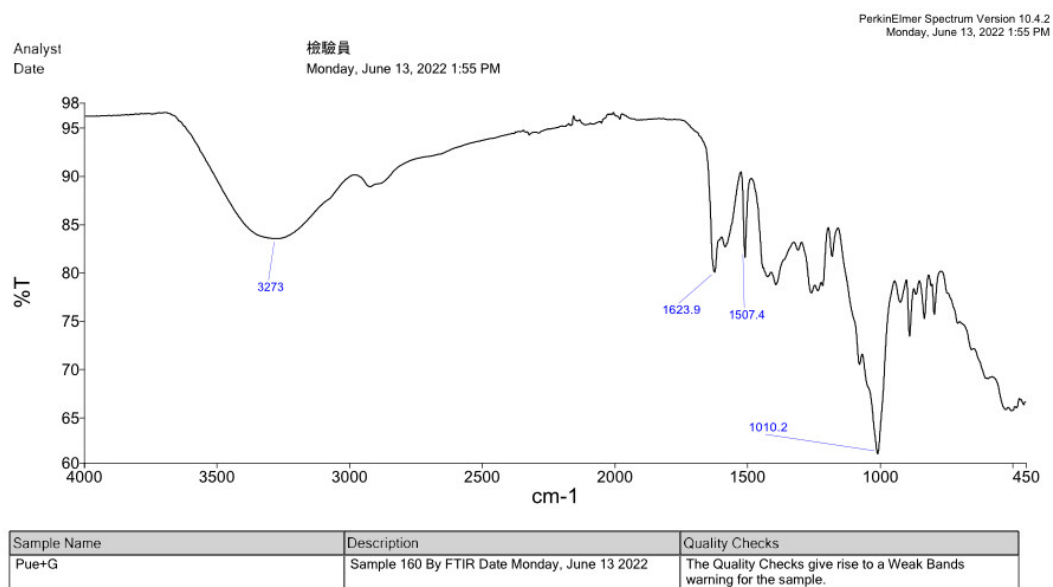

**Figure 3.** The infrared (IR) analysis of puerarin-4'-*O*- $\beta$ -glucoside (**1**).

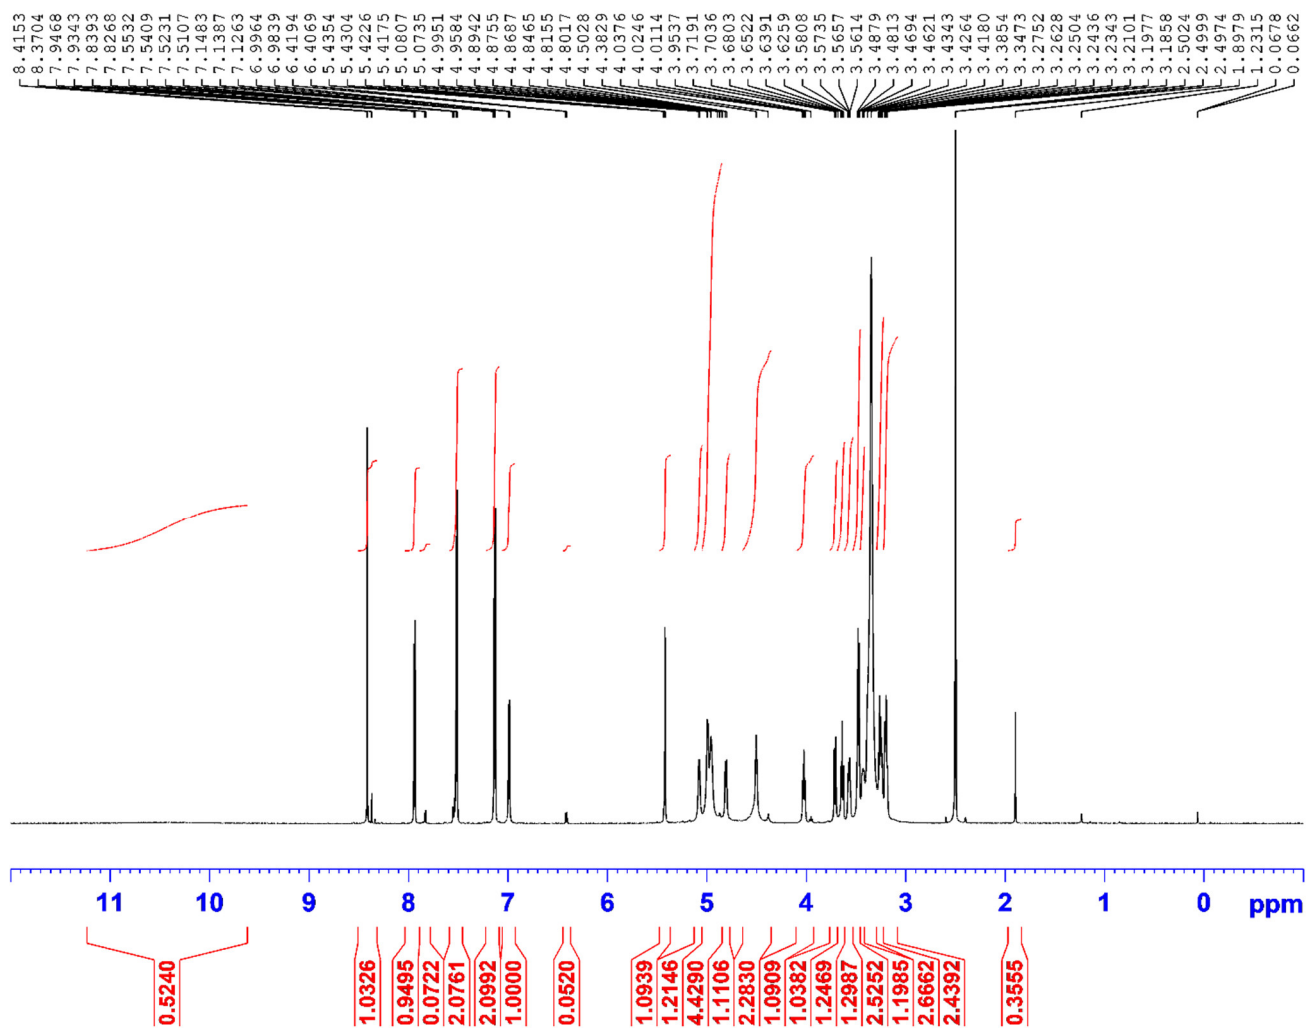

**Figure S4.** 1D NMR spectrum (<sup>1</sup>H-NMR, 700 MHz, DMSO-*d*<sub>6</sub>) of the puerarin-4'-O-β-glucoside (**1**).

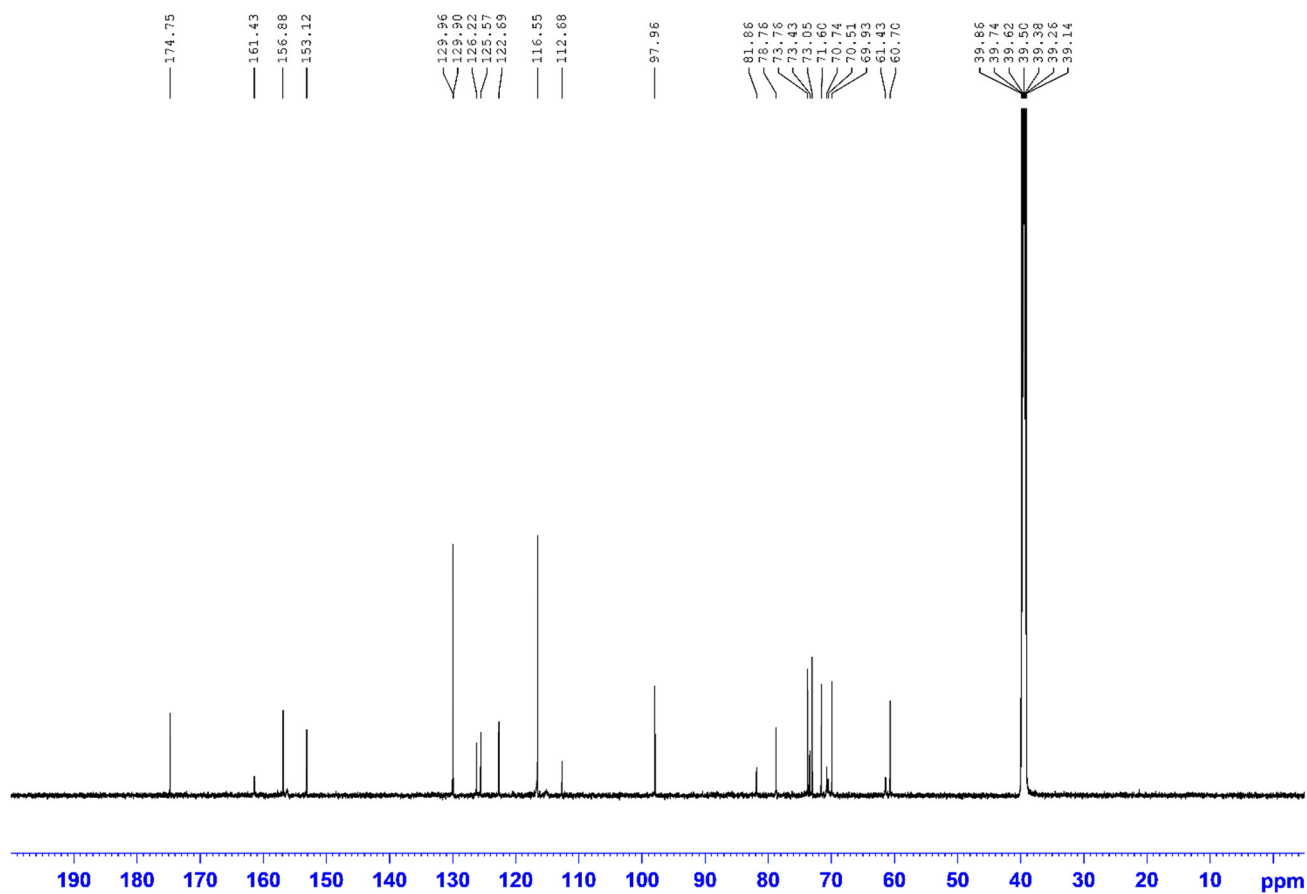

**Figure S5.** 1D NMR spectrum ( $^{13}\text{C}$ -NMR, 175 MHz,  $\text{DMSO}-d_6$ ) of the puerarin-4'- $O$ - $\beta$ -D-glucoside (**1**).



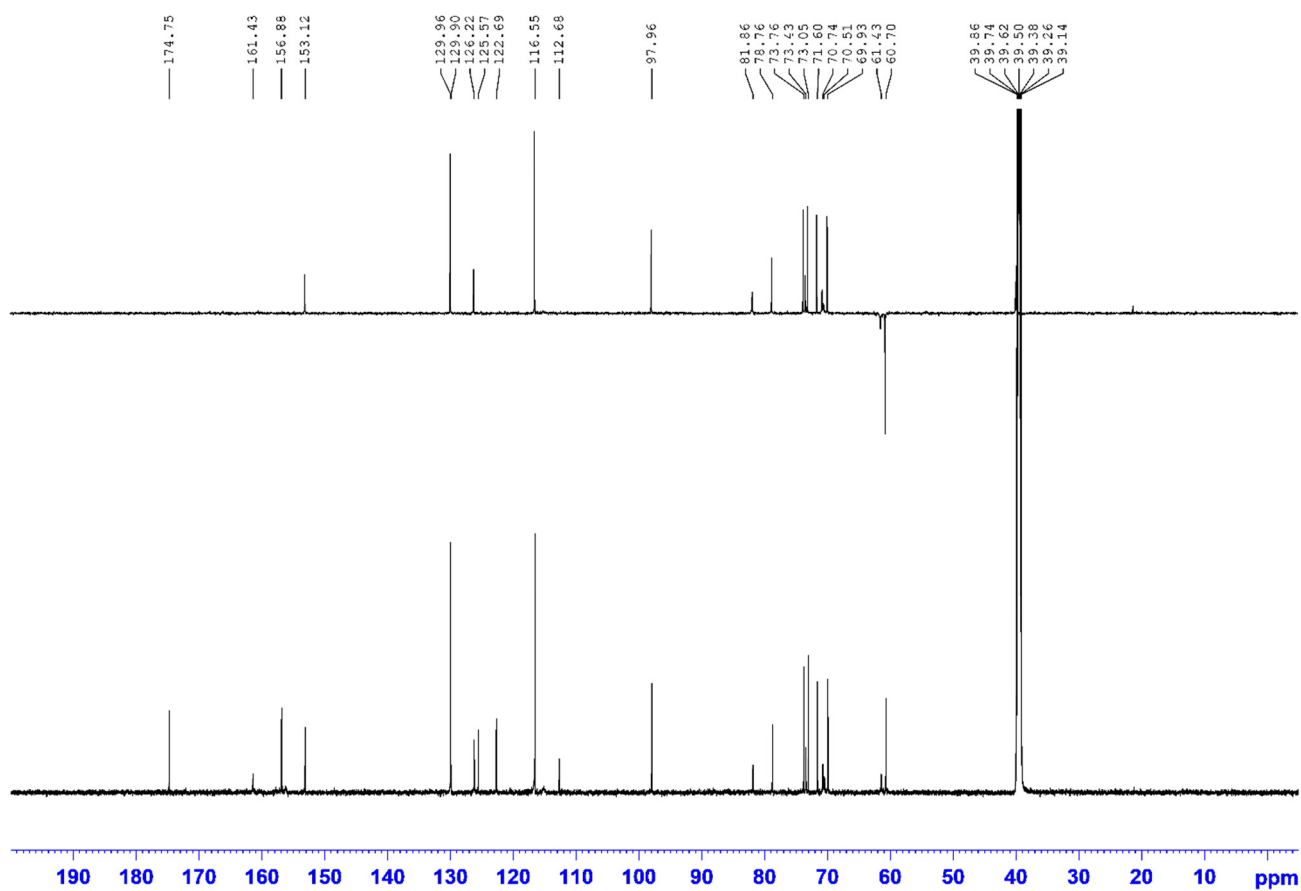

**Figure S6.** 1D NMR spectrum (DEPT-135, 175 MHz, DMSO-*d*<sub>6</sub>) of the puerarin-4'-*O*-β-glucoside (1).

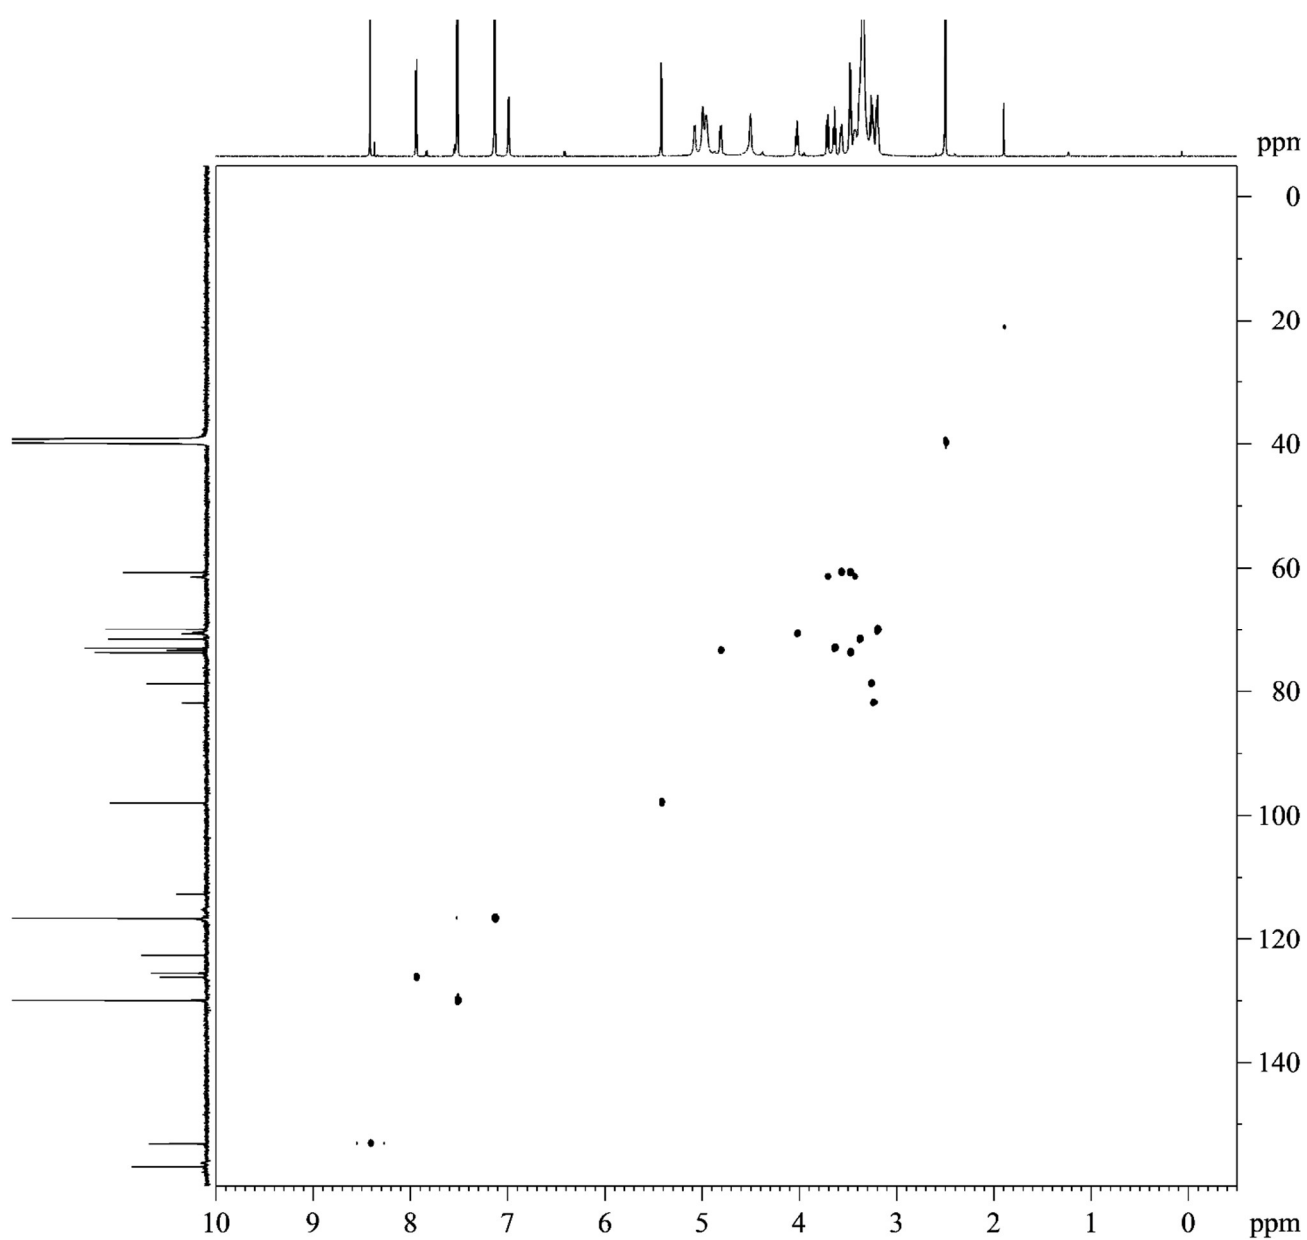

**Figure S7.** 2D NMR spectrum ( $^1\text{H}$ - $^{13}\text{C}$  HSQC, 700 MHz,  $\text{DMSO}-d_6$ ) of the puerarin-4'- $\text{O}$ - $\beta$ -glucoside (1).

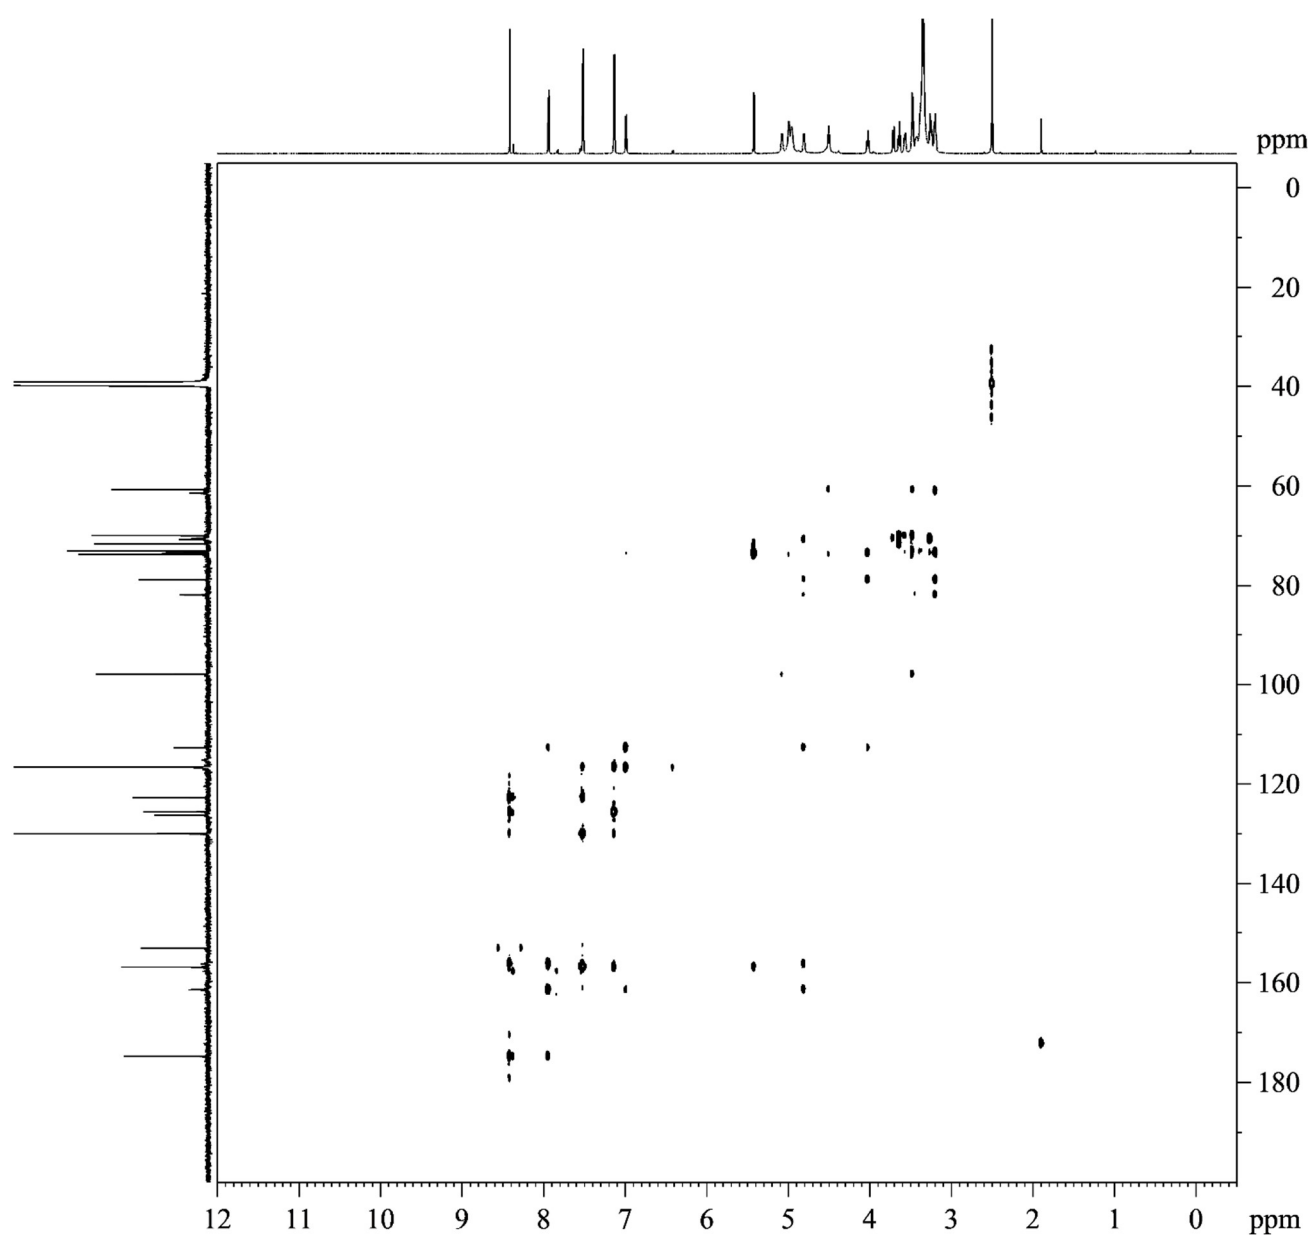

**Figure S8.** 2D NMR spectrum ( $^1\text{H}$ - $^{13}\text{C}$  HMBC, 700 MHz,  $\text{DMSO}-d_6$ ) of the puerarin-4'- $O$ - $\beta$ -D-glucoside (**1**).

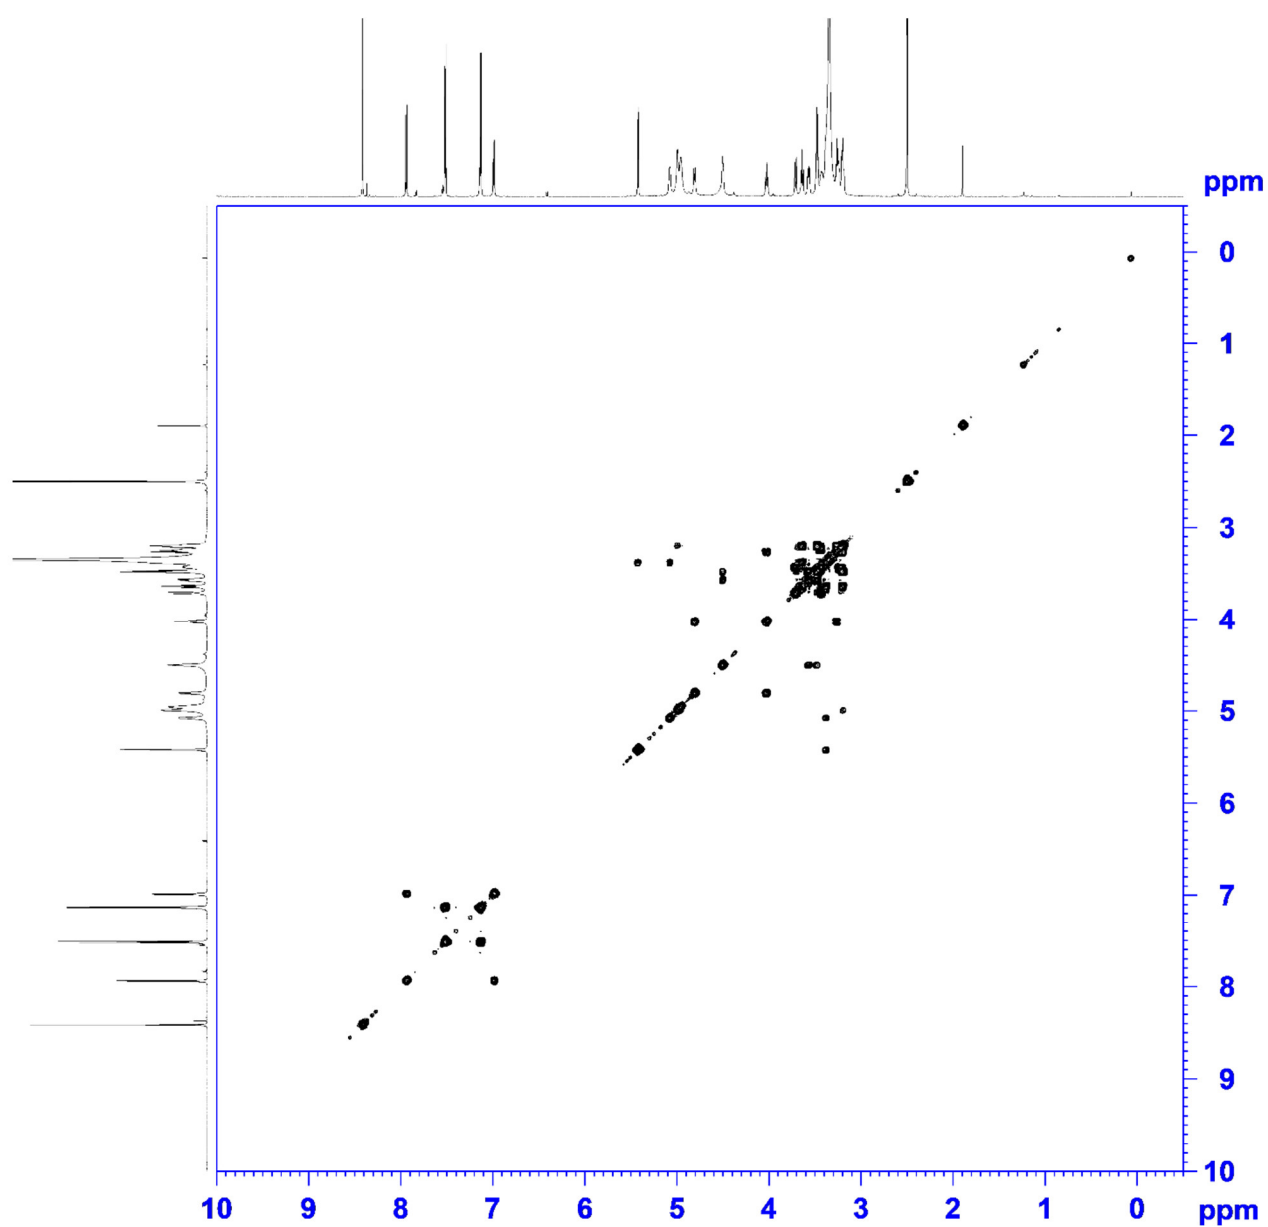

**Figure S9.** 2D NMR spectrum ( $^1\text{H}$ - $^1\text{H}$  COSY, 700 MHz,  $\text{DMSO}-d_6$ ) of the puerarin-4'- $O$ - $\beta$ -D-glucoside (1).

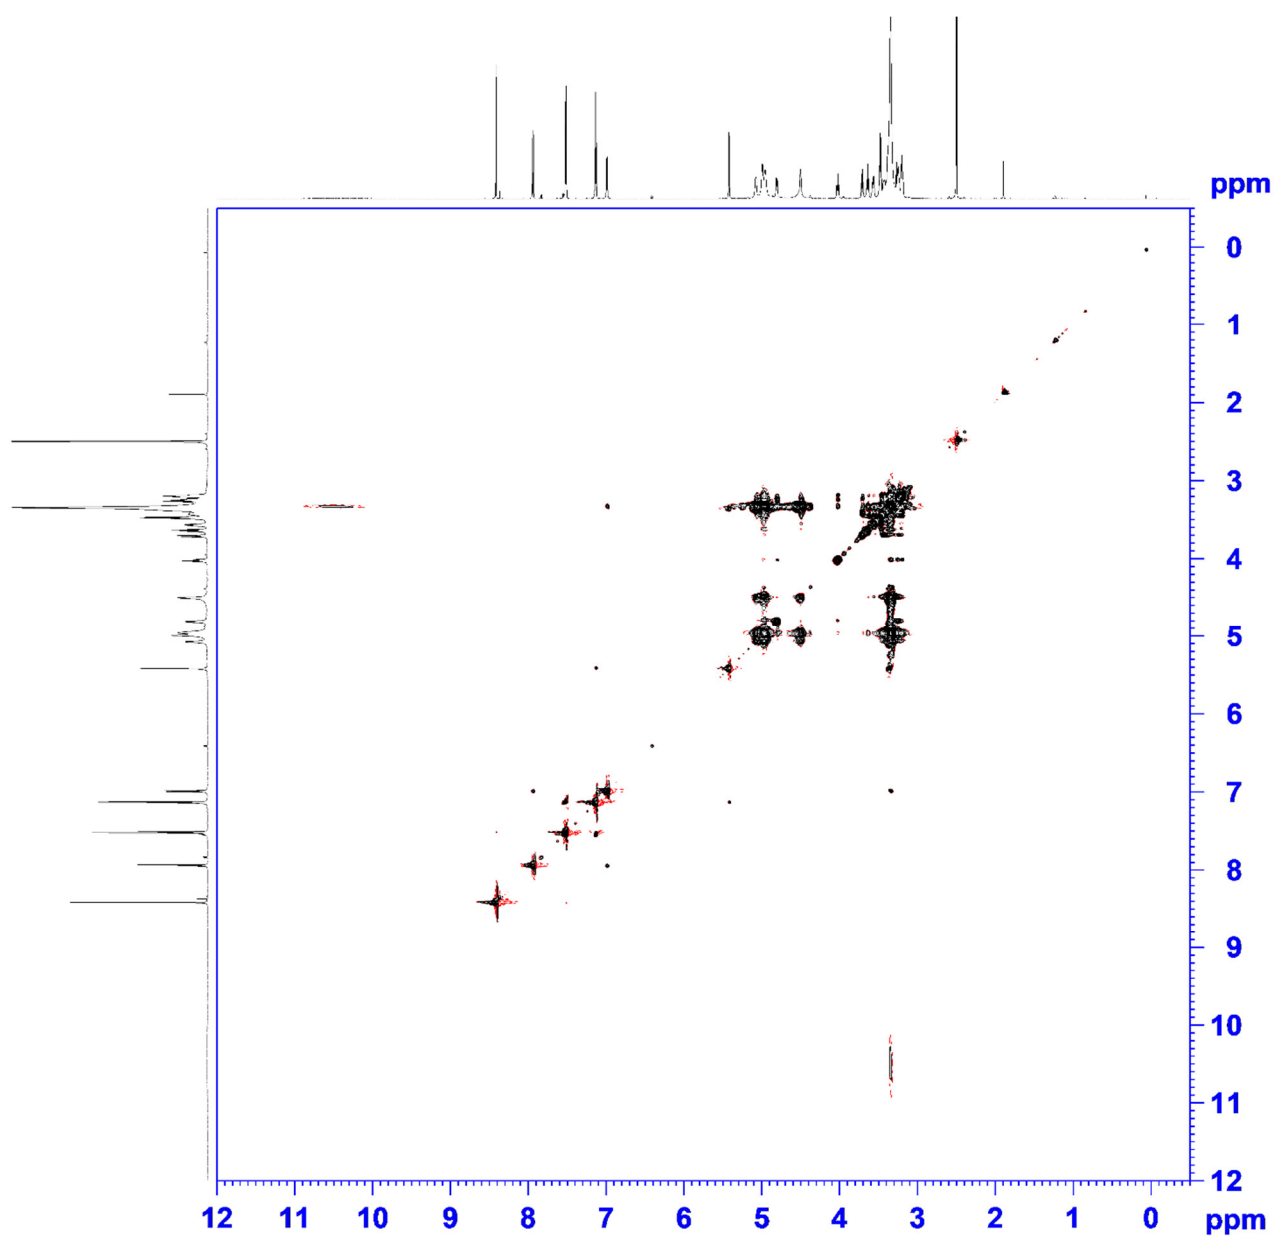

**Figure S10.** 2D NMR spectrum ( $^1\text{H}$ - $^1\text{H}$  NOESY, 700 MHz,  $\text{DMSO}-d_6$ ) of the puerarin-4'-O- $\beta$ -D-glucoside (1).
